# Supplementary material for: How scientists perceive the evolutionary origin of human traits: Results of a survey study
Source: PubMed Central journal article supplement (PMC5869357; doi:10.1002/ece3.3887), 2018-02-26
Supplement: ECE3-8-3518-s001.pdf [file ECE3-8-3518-s001.pdf]

## Appendix 1. List of the journals used to find invitees for the survey.

In all subject categories, the same cutoff limit for inclusion of a journal was applied:  
ISI Impact Factor  $\geq$  1.0

Journals of the following ISI categories were included, if they fulfilled the additional criterion specified in parentheses:

Palaeontology (all)

Zoology (all except journals whose focus excluded mammals)

Biology (excluding narrow specialities and biomedical journals)

Ecology (all journals that covered animal ecology, if not restricted to conservation or biogeography)

Evolutionary biology (excluding those restricted to non-mammalian taxa or molecular/genomic studies)

Anthropology (if they showed evidence of covering human evolution, not just culture)

Psychology, biological (if they showed evidence of covering evolutionary aspects)

Anatomy & morphology (if they showed evidence of covering evolutionary aspects and/or comparisons among species)

Behavioral sciences (if focus included wild animals and/or evolutionary aspects)

Dermatology (selected a few broad-scope top journals)

Neurosciences (some broad-scope journals)

Nutrition & Dietetics (some broad-scope journals)

Physiology (some broad-scope journals)

Respiratory system (some broad-scope journals)

Sport sciences (some broad-scope journals)

Searched in:

Science Citation Index Expanded (SCI-EXPANDED) --1900-present

Social Sciences Citation Index (SSCI) --1900-present

Date range: 1.1.2010-31.12.2012

Article type: Article or Review

Found 72861 articles

ISSN Abbreviated journal title

0873-9749 ACTA ETHOL

1146-609X ACTA OECOL

0567-7920 ACTA PALAEONTOL POL

0001-7272 ACTA ZOOL-STOCKHOLM

0065-2504 ADV ECOL RES

0065-3454 ADV STUD BEHAV

1042-0533 AM J HUM BIOL

0002-9483 AM J PHYS ANTHROPOL

0363-6135 AM J PHYSIOL-HEART C

1040-0605 AM J PHYSIOL-LUNG C

1931-857X AM J PHYSIOL-RENAL

0275-2565 AM J PRIMATOL

0003-0147 AM NAT

1932-8486 ANAT REC

0003-3472 ANIM BEHAV

1435-9448 ANIM COGN

0940-9602 ANN ANAT

0301-4460 ANN HUM BIOL

0753-3969 ANN PALEONTOL

0003-455X ANN ZOOL FENN

0084-6570 ANNU REV ANTHROPOL

1543-592X ANNU REV ECOL EVOL S

|                                |                                |
|--------------------------------|--------------------------------|
| 1941-1405 ANNU REV MAR SCI     | 0012-9658 ECOLOGY              |
| 0147-006X ANNU REV NEUROSCI    | 0394-9370 ETHOL ECOL EVOL      |
| 0199-9885 ANNU REV NUTR        | 0179-1613 ETHOLOGY             |
| 0066-4278 ANNU REV PHYSIOL     | 1436-6207 EUR J NUTR           |
| 0918-7960 ANTHROPOL SCI        | 0903-1936 EUR RESPIR J         |
| 1864-7790 AQUAT BIOL           | 0940-6719 EUR SPINE J          |
| 1386-2588 AQUAT ECOL           | 1060-1538 EVOL ANTHROPOL       |
| 1442-9985 AUSTRAL ECOL         | 1752-4571 EVOL APPL            |
| 0003-0090 B AM MUS NAT HIST    | 0071-3260 EVOL BIOL            |
| 1214-1119 B GEOSCI             | 1520-541X EVOL DEV             |
| 1439-1791 BASIC APPL ECOL      | 0269-7653 EVOL ECOL            |
| 1744-9081 BEHAV BRAIN FUNCT    | 1522-0613 EVOL ECOL RES        |
| 0166-4328 BEHAV BRAIN RES      | 1090-5138 EVOL HUM BEHAV       |
| 0140-525X BEHAV BRAIN SCI      | 0014-3820 EVOLUTION            |
| 1045-2249 BEHAV ECOL           | 0091-6331 EXERC SPORT SCI REV  |
| 0340-5443 BEHAV ECOL SOCIOBIOL | 0172-9179 FACIES               |
| 0376-6357 BEHAV PROCESS        | 0015-5713 FOLIA PRIMATOL       |
| 0005-7959 BEHAVIOUR            | 1435-1943 FOSS REC             |
| 1726-4170 BIOGEOSCIENCES       | 1662-5129 FRONT NEUROANAT      |
| 0006-3185 BIOL BULL-US         | 1742-9994 FRONT ZOOL           |
| 0024-4066 BIOL J LINN SOC      | 0269-8463 FUNCT ECOL           |
| 1744-9561 BIOL LETTERS         | 0966-6362 GAIT POSTURE         |
| 1464-7931 BIOL REV             | 1555-8932 GENES NUTR           |
| 0006-3568 BIOSCIENCE           | 1472-4677 GEOBIOLOGY           |
| 0006-3606 BIOTROPICA           | 0016-6995 GEOBIOS-LYON         |
| 1741-7007 BMC BIOL             | 1280-9659 GEODIVERSITAS        |
| 1471-2148 BMC EVOL BIOL        | 1695-6133 GEOL ACTA            |
| 0006-8950 BRAIN                | 0147-9563 HEART LUNG           |
| 0006-8977 BRAIN BEHAV EVOLUT   | 0018-067X HEREDITY             |
| 0093-934X BRAIN LANG           | 0891-2963 HIST BIOL            |
| 0165-0173 BRAIN RES REV        | 0018-7143 HUM BIOL             |
| 1863-2653 BRAIN STRUCT FUNCT   | 0300-7839 HUM ECOL             |
| 0007-1145 BRIT J NUTR          | 0167-9457 HUM MOVEMENT SCI     |
| 0008-4301 CAN J ZOOL           | 1045-6767 HUM NATURE-INT BIOS  |
| 0009-7322 CIRCULATION          | 1479-5868 INT J BEHAV NUTR PHY |
| 0748-3007 CLADISTICS           | 0307-0565 INT J OBESITY        |
| 1095-6433 COMP BIOCHEM PHYS A  | 1747-7166 INT J PEDIATR OBES   |
| 1383-4517 CONTRIB ZOOL         | 0164-0291 INT J PRIMATOL       |
| 0010-9452 CORTEX               | 1526-484X INT J SPORT NUTR EXE |
| 1631-0683 CR PALEVOL           | 1540-7063 INTEGR COMP BIOL     |
| 0195-6671 CRETACEOUS RES       | 1749-4877 INTEGR ZOOL          |
| 0011-3204 CURR ANTHROPOL       | 0190-9622 J AM ACAD DERMATOL   |
| 0949-944X DEV GENES EVOL       | 0021-8782 J ANAT               |
| 0378-3782 EARLY HUM DEV        | 0021-8790 J ANIM ECOL          |
| 0906-7590 ECOGRAPHY            | 1827-4765 J ANTHROPOL SCI      |
| 1476-945X ECOL COMPLEX         | 8750-7587 J APPL PHYSIOL       |
| 1461-023X ECOL LETT            | 0305-4403 J ARCHAEOL SCI       |
| 0012-9615 ECOL MONOGR          | 0250-5991 J BIOSCIENCES        |
| 0912-3814 ECOL RES             | 0021-9967 J COMP NEUROL        |

Tuomisto, H., Tuomisto, M. & Tuomisto, J.T. How scientists perceive the evolutionary origin of human traits: results of a survey study. Ecology and Evolution. Appendix 1.

0340-7594 J COMP PHYSIOL A  
0174-1578 J COMP PHYSIOL B  
0735-7036 J COMP PSYCHOL  
0923-1811 J DERMATOL SCI  
0289-0771 J ETHOL  
1010-061X J EVOLUTION BIOL  
0022-0949 J EXP BIOL  
0022-0981 J EXP MAR BIOL ECOL  
0097-7403 J EXP PSYCHOL ANIM B  
1932-5223 J EXP ZOOLOG PART A  
1552-5007 J EXP ZOOLOG PART B  
0096-1191 J FORAMIN RES  
0047-2484 J HUM EVOL  
0952-3871 J HUM NUTR DIET  
1550-2783 J INT SOC SPORT NUTR  
0022-202X J INVEST DERMATOL  
1064-7554 J MAMM EVOL  
0022-2372 J MAMMAL  
0047-2565 J MED PRIMATOL  
0362-2525 J MORPHOL  
0022-3166 J NUTR  
0022-3360 J PALEONTOL  
0267-8179 J QUATERNARY SCI  
1477-2019 J SYST PALAEONTOL  
0306-4565 J THERM BIOL  
0266-4674 J TROP ECOL  
0272-4634 J VERTEBR PALEONTOL  
0952-8369 J ZOOLOG  
0947-5745 J ZOOLOG SYST EVOL RES  
0024-1164 LETHAIA  
1616-5047 MAMM BIOL  
0305-1838 MAMMAL REV  
0025-3162 MAR BIOL  
1745-1000 MAR BIOL RES  
0173-9565 MAR ECOL-EVOL PERSP  
0171-8630 MAR ECOL-PROG SER  
1323-1650 MAR FRESHWATER RES  
0824-0469 MAR MAMMAL SCI  
0377-8398 MAR MICROPALAEONTOL  
1740-8695 MATERN CHILD NUTR  
0195-9131 MED SCI SPORT EXER  
1471-003X NAT REV NEUROSCI  
0896-6273 NEURON  
1743-7075 NUTR METAB  
0271-5317 NUTR RES  
0954-4224 NUTR RES REV  
0029-6643 NUTR REV  
0899-9007 NUTRITION  
1930-7381 OBESITY  
0029-8549 OECOLOGIA  
0030-1299 OIKOS  
1439-6092 ORG DIVERS EVOL  
0962-8452 P ROY SOC B-BIOL SCI  
0031-0182 PALAEOGEOGR PALAEOCL  
0375-0442 PALAEOONTOGR ABT A  
0375-0299 PALAEOONTOGR ABT B  
1935-3952 PALAEOONTOLOG ELECTRON  
0031-0220 PALAEOONTOLOG Z  
0031-0239 PALAEOONTOLOGY  
0883-1351 PALAIOS  
0094-8373 PALEOBIOLOGY  
0883-8305 PALEOCEANOGRAPHY  
0962-8436 PHILOS T R SOC B  
1522-2152 PHYSIOL BIOCHEM ZOOLOG  
0031-9333 PHYSIOL REV  
1548-9213 PHYSIOLOGY  
1544-9173 PLOS BIOL  
0032-8332 PRIMATES  
0079-6123 PROG BRAIN RES  
0163-7827 PROG LIPID RES  
0301-0082 PROG NEUROBIOL  
0033-5770 Q REV BIOL  
0033-5894 QUATERNARY RES  
0277-3791 QUATERNARY SCI REV  
0217-2445 RAFFLES B ZOOLOG  
1465-993X RESP RES  
1323-7799 RESPIROLOGY  
0034-6667 REV PALAEOBOT PALYNO  
0038-6804 SPEC PAP PALAEOONTOLOG  
0362-2436 SPINE  
1063-5157 SYST BIOL  
1547-139X STRATIGRAPHY  
1364-6613 TRENDS COGN SCI  
0169-5347 TRENDS ECOL EVOL  
0166-2236 TRENDS NEUROSCI  
0939-6314 VEG HIST ARCHAEOBOT  
0096-848X YEARB PHYS ANTHROPOL  
0044-5231 ZOOLOG ANZ  
0024-4082 ZOOLOG J LINN SOC-LOND  
0300-3256 ZOOLOG SCR  
0944-2006 ZOOLOGY  
0720-213X ZOOMORPHOLOGY
